# Supplementary material
Source: MDPI journal article supplement (https://www.mdpi.com/2313-0105/8/8/89)
Supplement: s1 [file s1]

# Nano-composite Janus gel polymer electrolytes for lithium metal batteries

Riccardo Morina <sup>1,2</sup>, Rebecca Baroni <sup>1</sup>, Daniele Callegari <sup>2,3</sup>, Eliana Quartarone <sup>2,3</sup> and Piercarlo Mustarelli <sup>1,2,\*</sup>

<sup>1</sup> Department of Materials Science, University of Milano Bicocca, Via Cozzi 55, 20125 Milano, Italy

<sup>2</sup> Italian Reference Centre for Electrochemical Energy Storage (GISEL) - INSTM, Via G. Giusti 9, 50121 Firenze, Italy

<sup>3</sup> Department of Chemistry, University of Pavia, Via Taramelli 16, 27100 Pavia, Italy

\* Correspondence: piercarlo.mustarelli@unimib.it

SUPPLEMENTARY INFORMATION

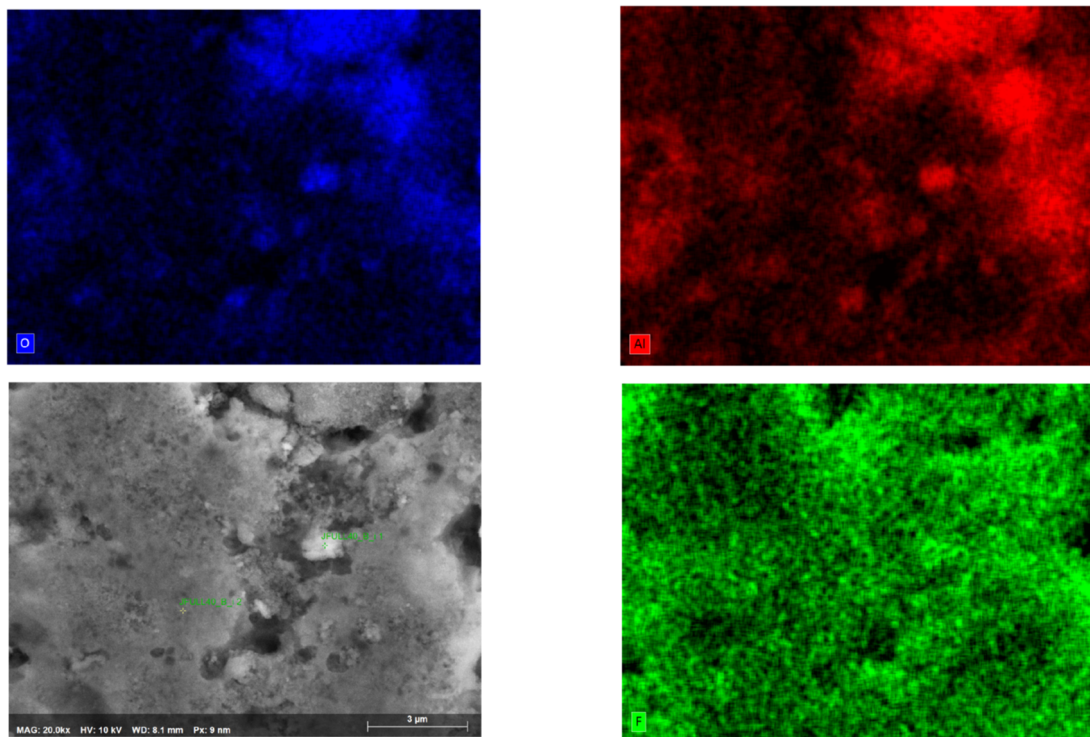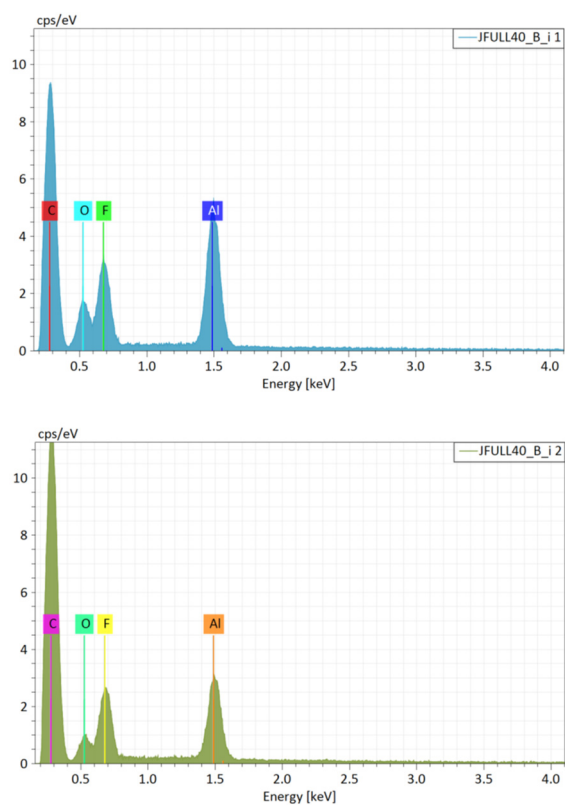

**Figure S1.** Backscattered electrons images and SEM-EDX distributions on the conducting side of FULL 40 JM before cycling.

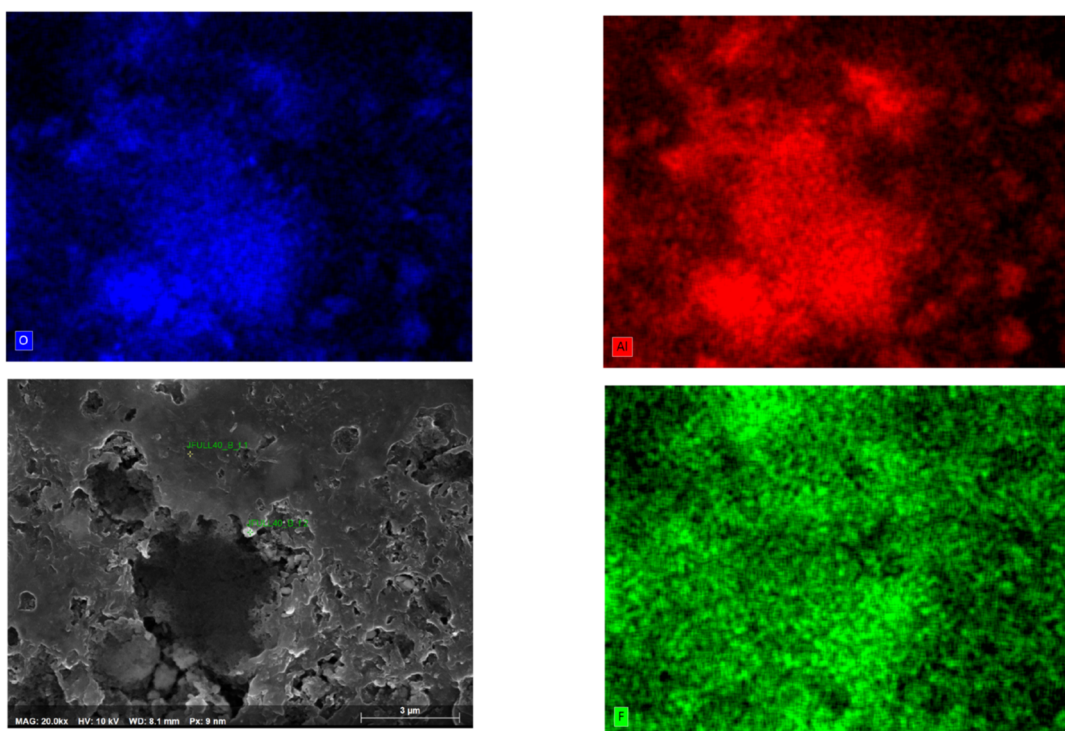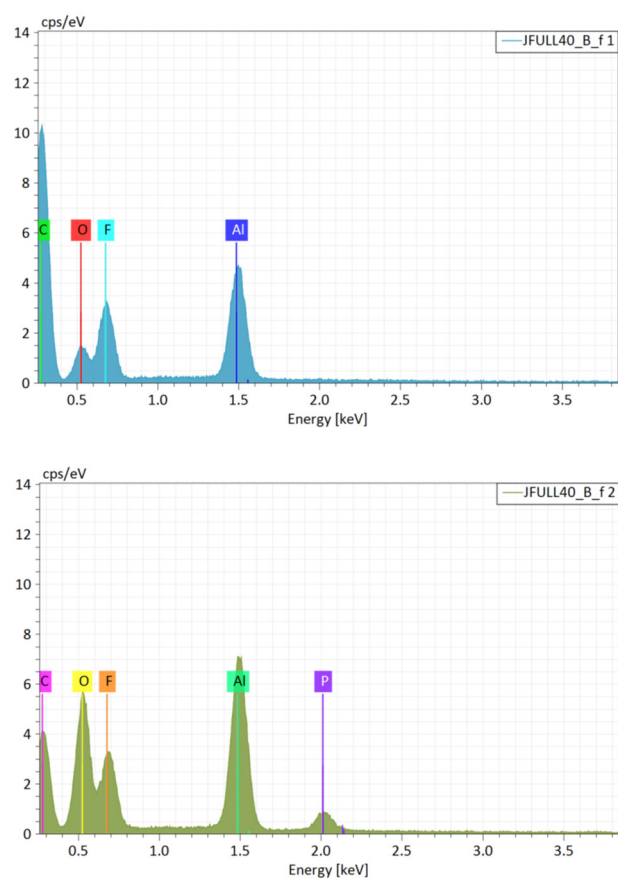

**Figure S2.** Backscattered electrons images and SEM-EDX distributions on the conducting side of FULL 40 JM after cycling.

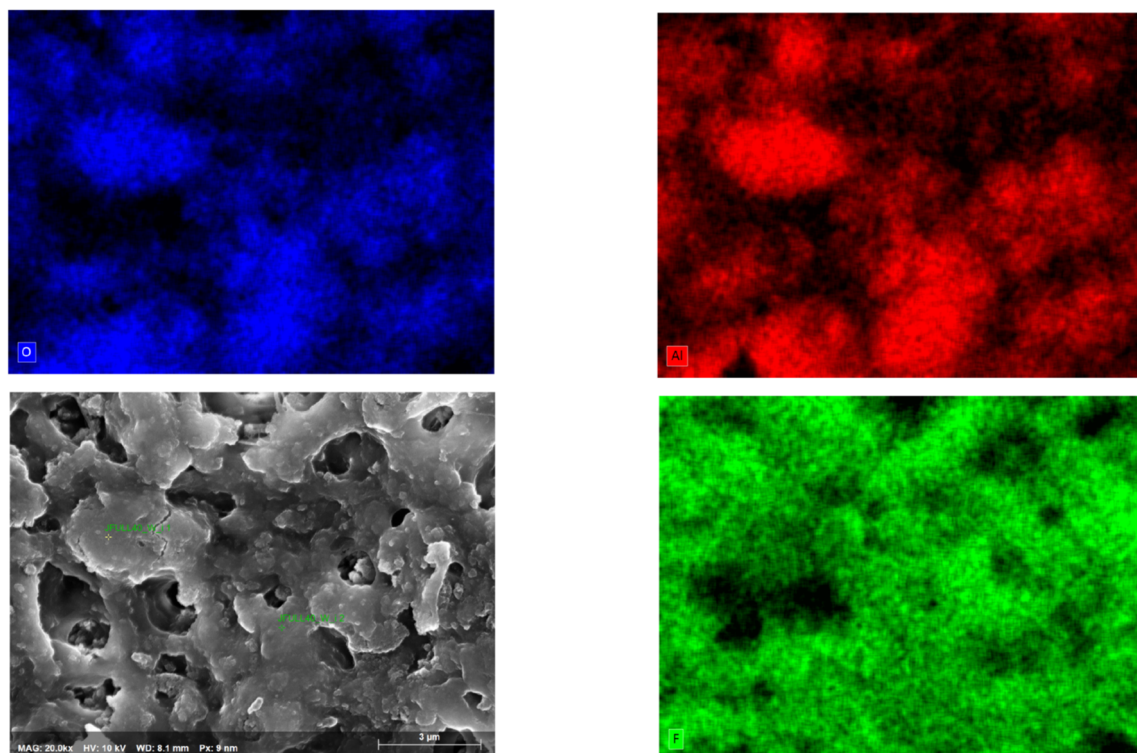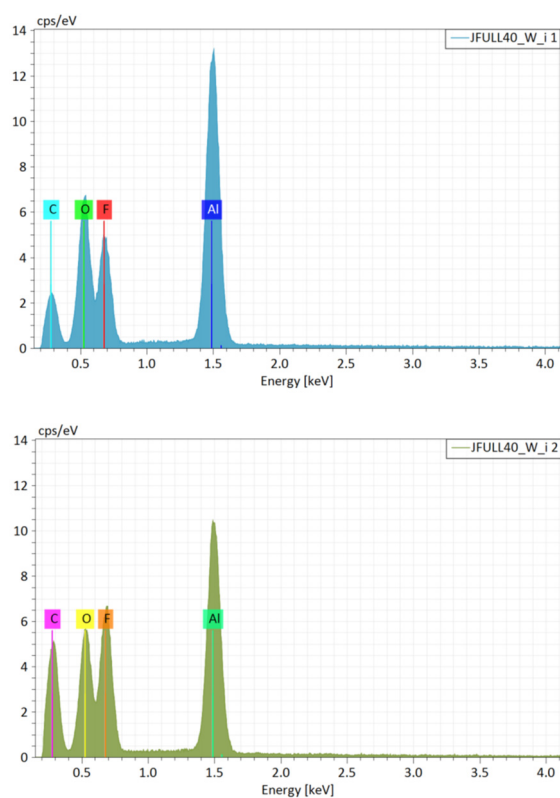

**Figure S3.** Backscattered electrons images and SEM-EDX distributions on the isolating side of FULL 40 JM before cycling.

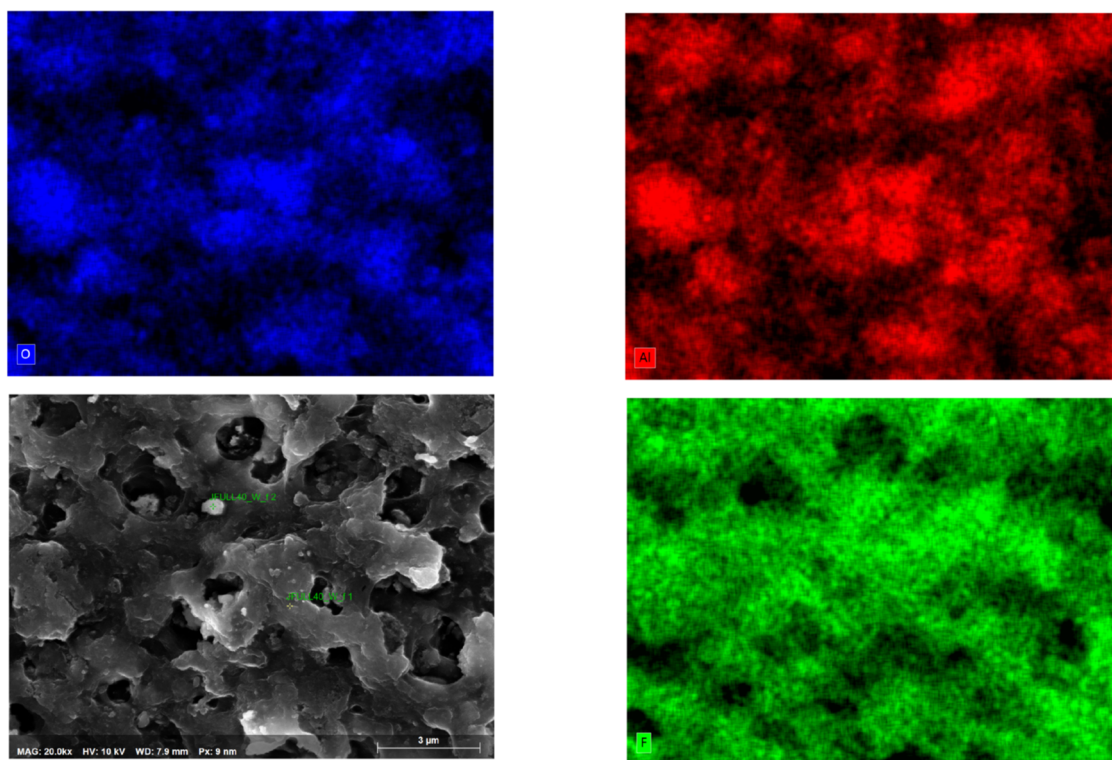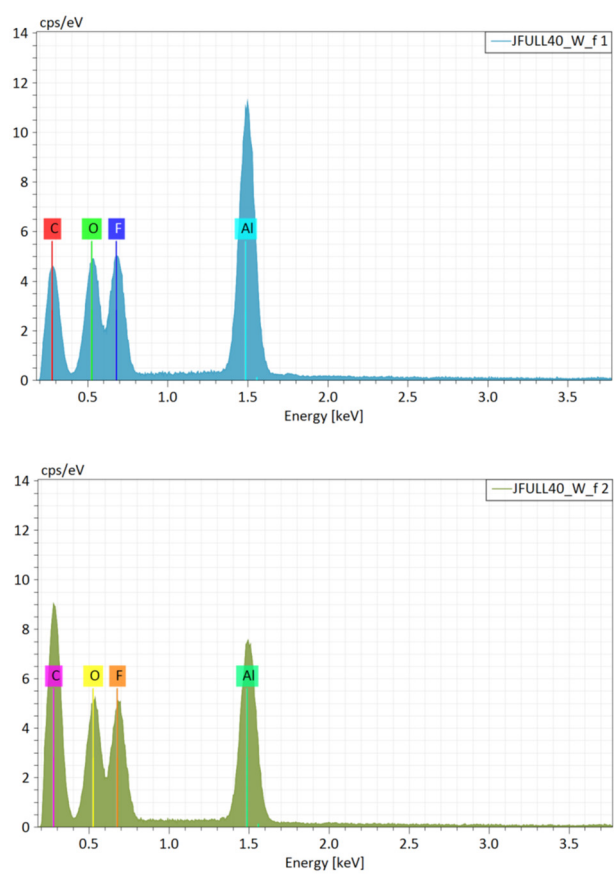

**Figure S4.** Backscattered electrons images and SEM-EDX distributions on the isolating side of FULL 40 JM after cycling.
